# Supplementary material for: Application of pre-adaptation strategies to improve the growth of probiotic lactobacilli under food-relevant stressful conditions
Source: Royal Society of Chemistry journal article supplement (doi:10.1039/d2fo03215e), 2023-01-01
Supplement: d2fo03215e1.pdf [file d2fo03215e1.pdf]

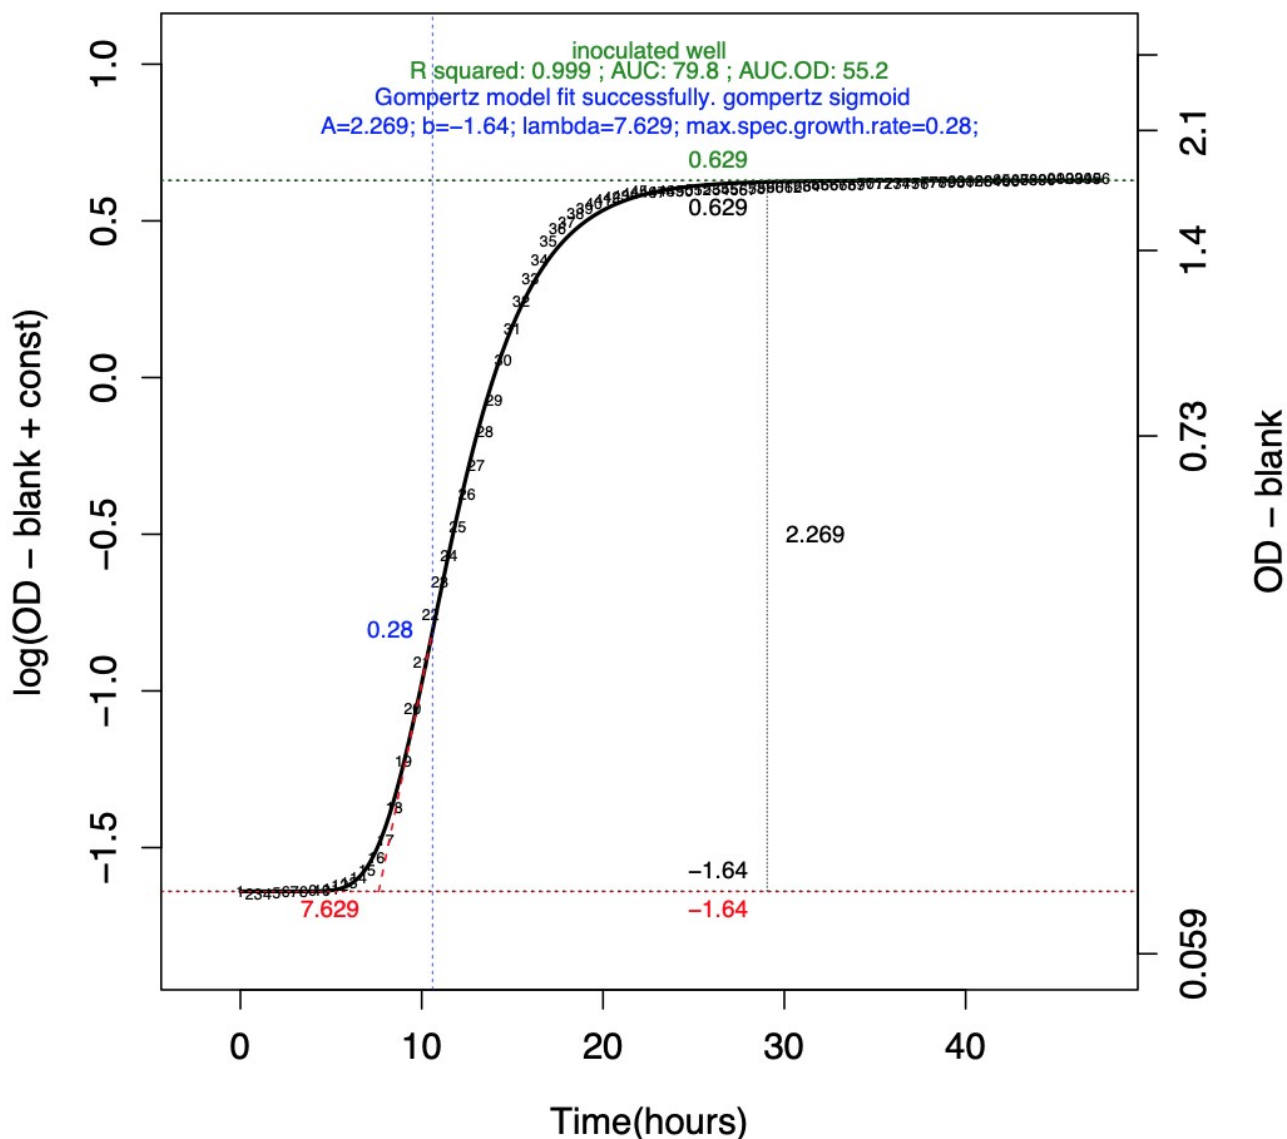

Fig S1: Output of the GCAT fitting of the turbidimetric growth curve (one replicate as example) of *L. acidophilus* pre-adapted in SUB1 condition and challenged in MRS containing 0.7M sucrose. R squared is the coefficient of determination; AUC is "Area Under the Curve" and AUC.OD is log-transformed AUC.
